# Supplementary material for: Odor-evoked inhibition of olfactory sensory neurons drives olfactory perception in Drosophila
Source: PubMed Central journal article supplement (PMC5676773; doi:10.1038/s41467-017-01185-0), 2017-11-07
Supplement: 41467_2017_1185_MOESM1_ESM.pdf [file 41467_2017_1185_MOESM1_ESM.pdf]

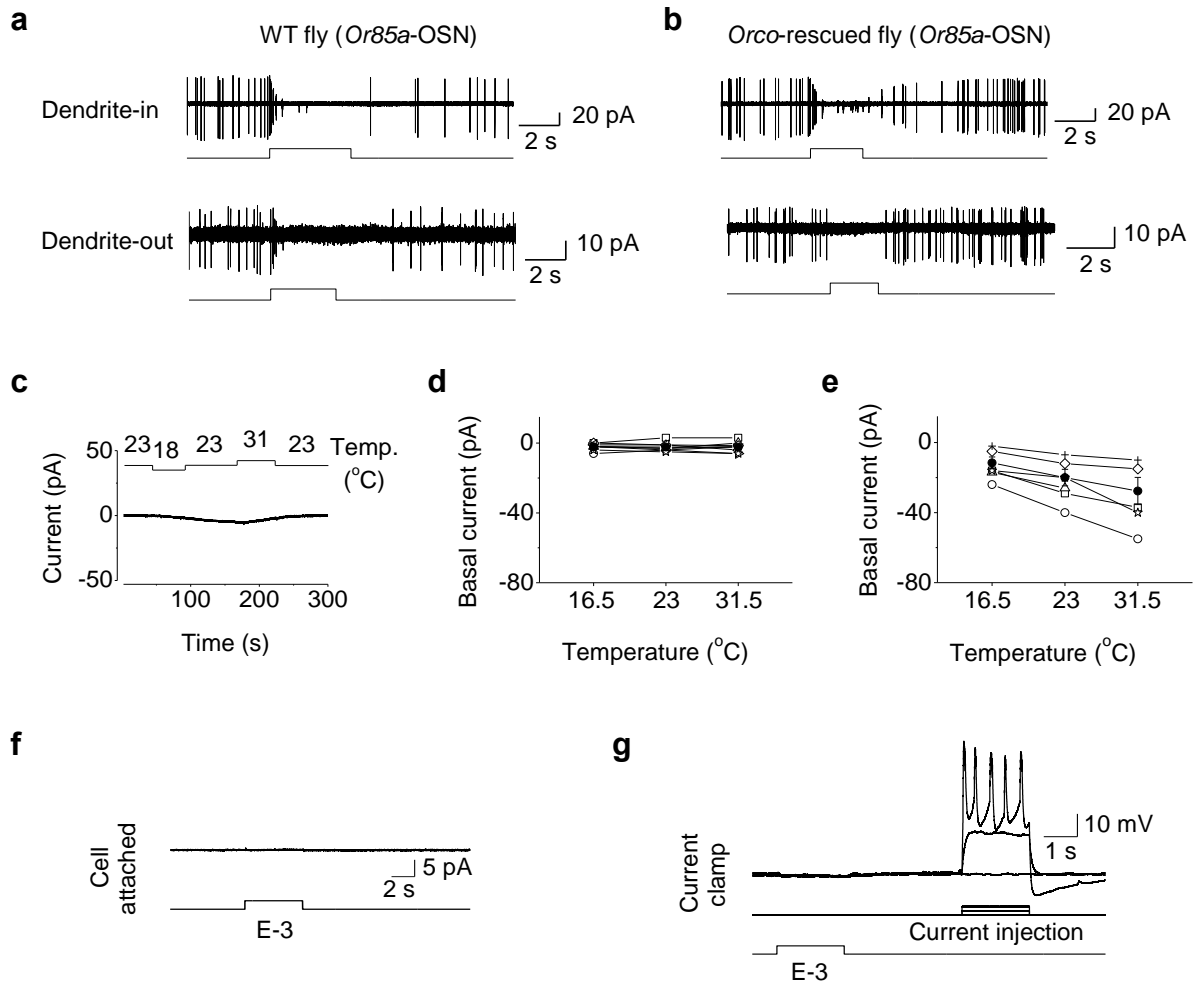

1  
2 **Supplementary Figure 1**

3  
4 **Direct odor inhibition, temperature and *Orco* dependence of basal receptor current**  
5 **in *Or85a*-OSNs**

6  
7 (a) Cell-attached recordings from *Or85a*-OSNs in WT flies. Top, recording from an  
8 *Or85a*-OSN with its sensory dendrite remaining intact in the sensillum (Dendrite-in)<sup>25</sup>.  
9 Bottom, recording from an isolated *Or85a*-OSN with its dendrite pulled out from the  
10 sensillum socket and directly exposed to the bath perfusion (Dendrite-out)<sup>25</sup>, which  
11 eliminates ephaptic inhibition from the neighboring OSN dendrites in the same  
12 sensillum<sup>26</sup>. Timing of the odor stimulation is indicated at the bottom. Odor concentration:  
13 10 mM acetophenone. (b) Cell-attached recordings from *OR85a*-OSNs in the flies with  
14 *Orco* restored in *Orco*<sup>-/-</sup> background. Top, recording from an *Or85a*-OSN in the  
15 Dendrite-in configuration. Bottom, recording from an *Or85a*-OSN in the Dendrite-out  
16 configuration. Odor concentration: 10 mM acetophenone. (c) No change in basal current  
17 by temperature in *Or85a*-OSNs of *Orco*<sup>-/-</sup> flies. Temperature changes are indicated above  
18 the recording trace. (d) Collective data for the basal current at different temperatures in  
19 *Or85a*-OSNs of *Orco*<sup>-/-</sup> flies, with average indicated in black dots. (e) The collective data

20 of temperature-dependence of the basal current in *Or85a*-OSNs of WT flies, with average  
21 indicated in black dots. (f) Loss of spontaneous activity and odor-evoked responses in  
22 *Or85a*-OSNs of *Orco*<sup>-/-</sup> flies. Under the cell-attached configuration, strong odor  
23 stimulation with E-3 (10 mM, 5 s) did not trigger any action-potential firing. (g) The  
24 dependence of odor-evoked depolarization on the presence of *Orco*. Under the current  
25 clamp, odor stimulation as in (a) did not induce any depolarization in the perforated-  
26 patch-clamped *Or85a*-OSNs of the *Orco*<sup>-/-</sup> flies. Injections of inward currents (3 and 5 pA;  
27 5 s) depolarizes the OSN and triggers bursts of firing, indicating that the OSN is  
28 electrically excitable.  
29

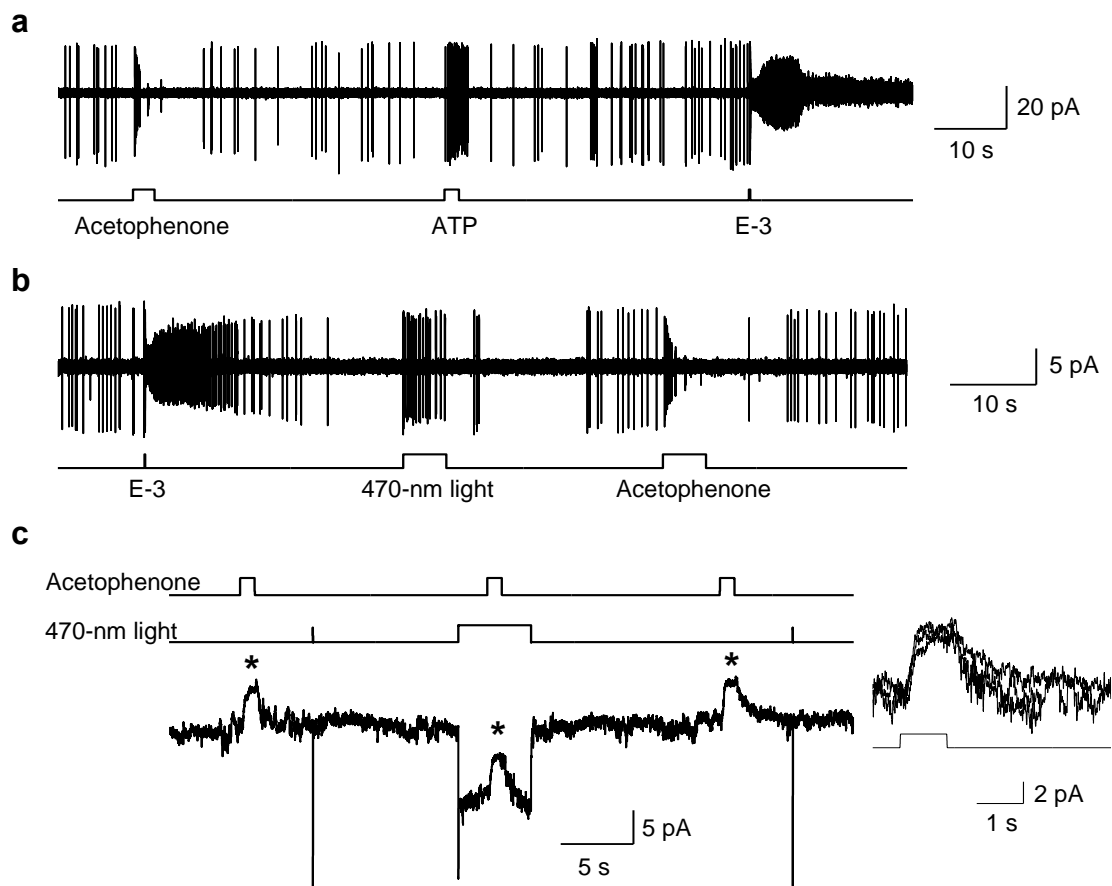

30

## 31 **Supplementary Figure 2**

32

### 33 **ATP and light-induced excitatory responses in *Or85a*-OSNs**

34

35 **(a)** Under the cell-attached configuration, *Or85a*-OSNs expressing the ATP-gated P2X<sub>2</sub>  
 36 cation channel were stimulated by acetophenone (20 mM, 3 s), ATP (1 mM, 2 s), and E-3  
 37 (1 mM, 35 ms). **(b)** Spike firing induced by both odor and light in *Or85a*-OSNs. Under  
 38 the cell-attached configuration, the OSN expressing ChR2 was stimulated by E-3 (1 mM,  
 39 35 ms), acetophenone (20 mM, 5 s), and 470 nm light (5 s). The timing of odor and light  
 40 stimulation is indicated at the bottom. **(c)** Acetophenone inhibited the basal current but  
 41 not the ChR2-induced current. Inset, overlap of the acetophenone-induced outward  
 42 currents in the absence or presence of light-induced inward current. The timing of the  
 43 application of acetophenone and 470-nm light (10 ms) is indicated on the top.

44

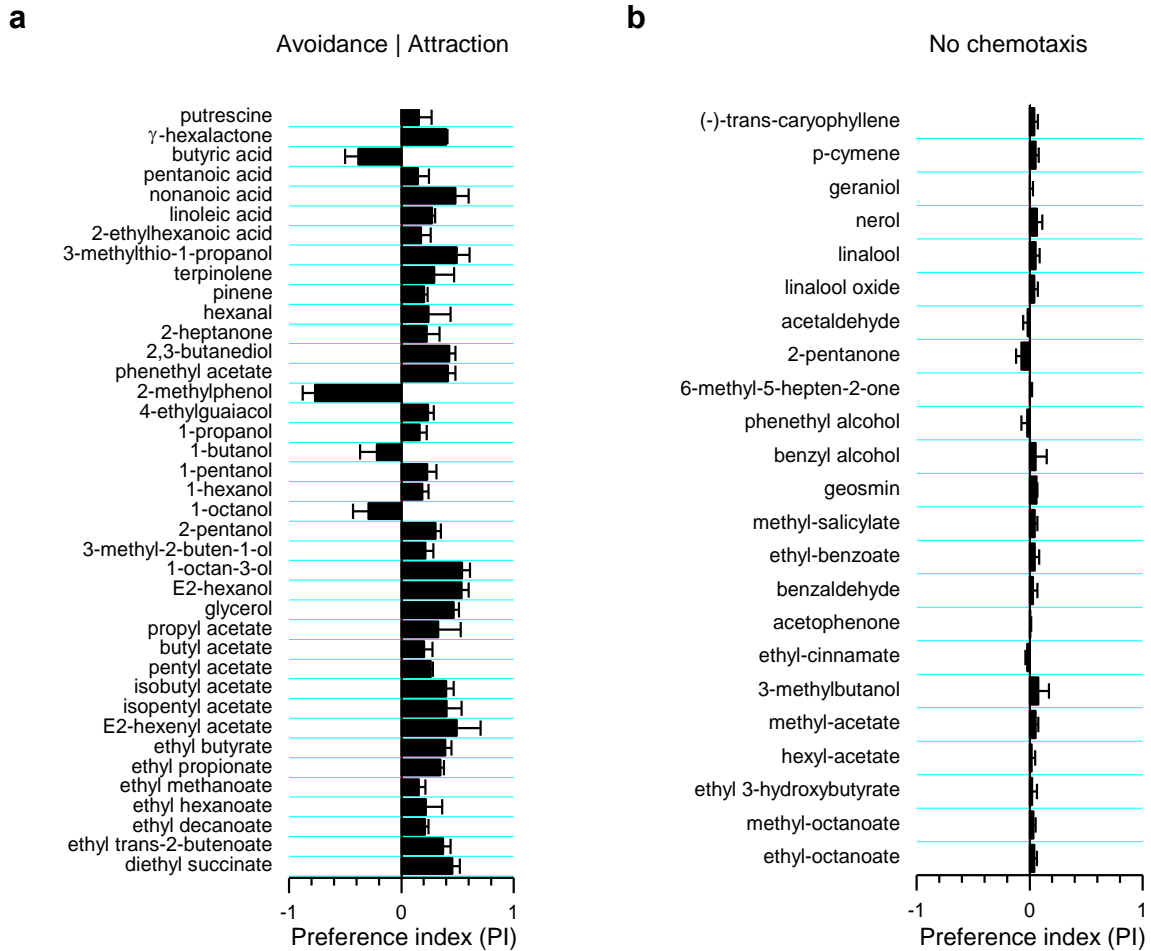46 **Supplementary Figure 3**

47

48 **Chemotaxis of *Orco*<sup>-/-</sup> flies to odors**

49

50 (a) Avoidance and attraction by different odors, which are probably mediated by other  
 51 chemoreceptors, such as ionotropic receptors and gustatory receptors. Odors as indicated  
 52 (dissolved in mineral oil or water). (b) Odors did not trigger obvious chemotaxis in  
 53 *Orco*<sup>-/-</sup> flies.

54

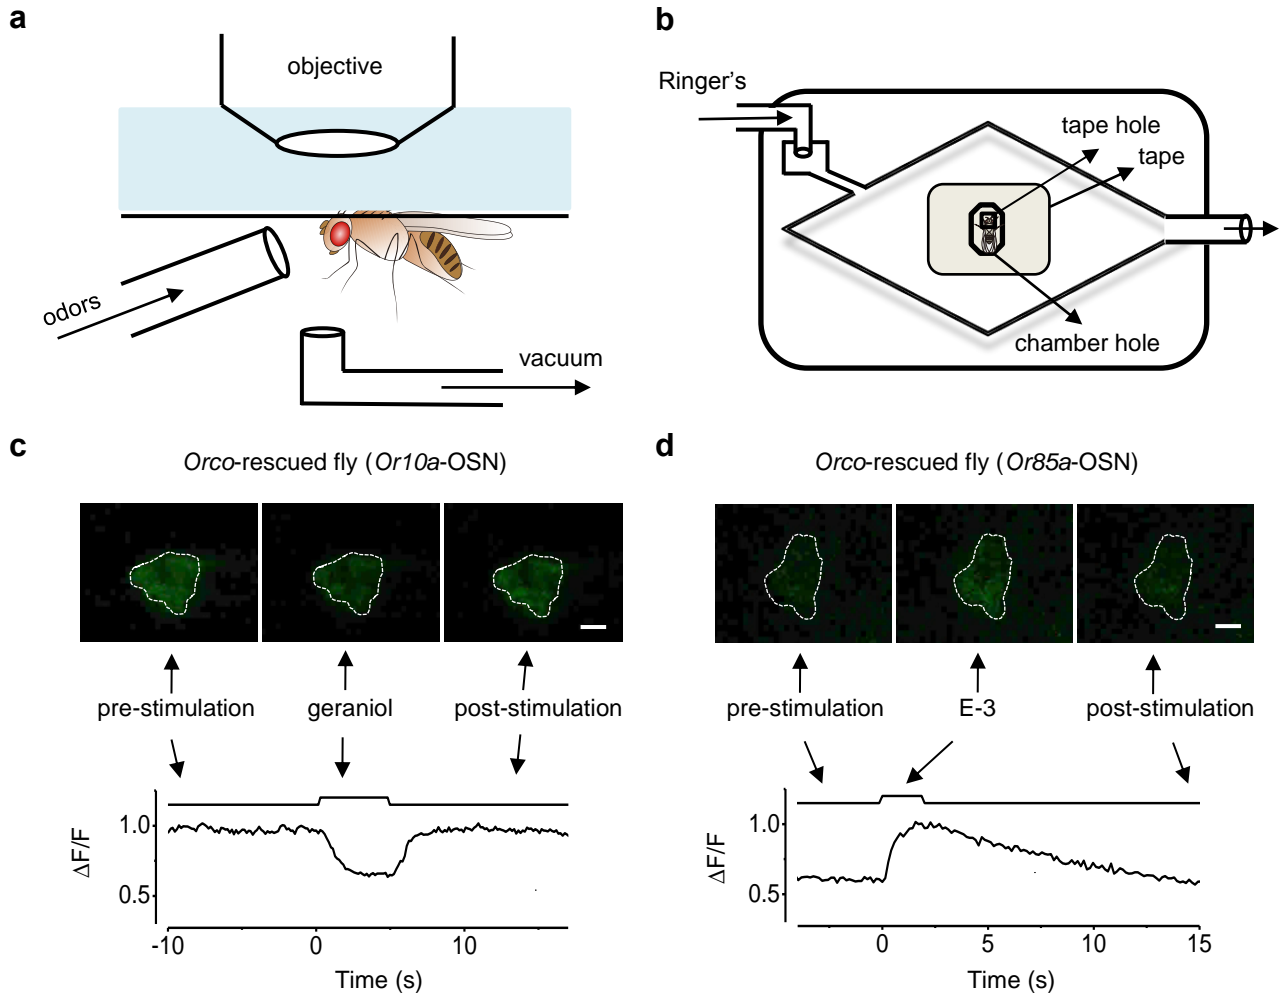

56

57 **Supplementary Figure 4**

58

59 **Calcium imaging of the antennal lobe in a live fly**

60

61 (a) Schematic of the calcium imaging and odor stimulation. (b) Schematic of the  
 62 recording chamber. (c) Odor-evoked inhibitory responses. (d) Odor-evoked excitatory  
 63 responses. Scale bar: 10  $\mu$ m.

64

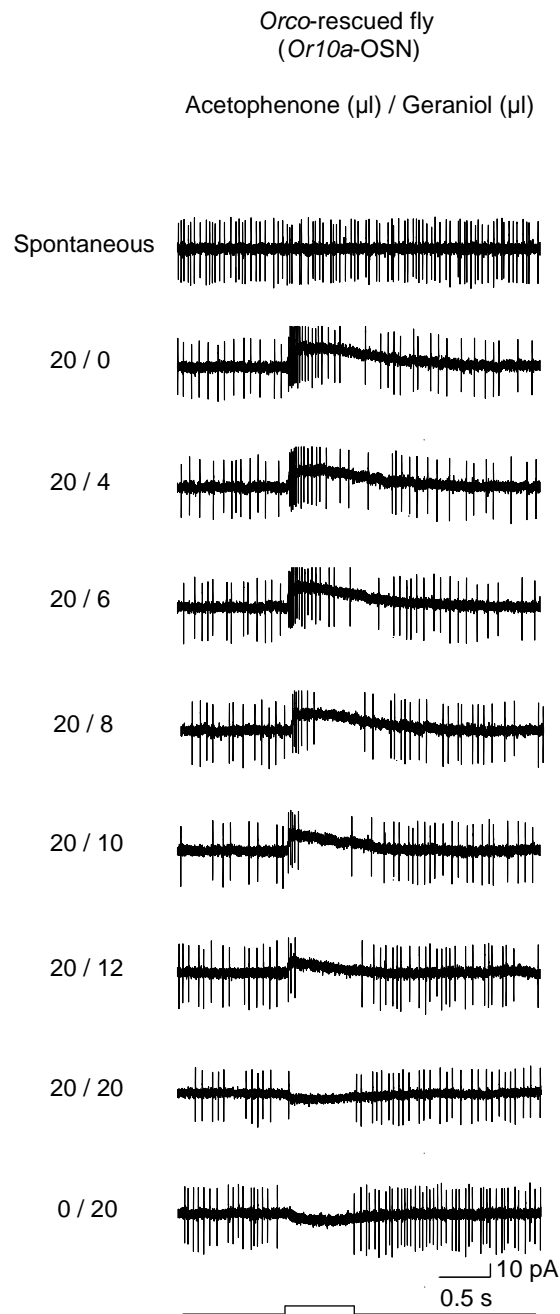

65

66 **Supplementary Figure 5**

67

68 **Spike firing of *Or10a*-OSNs in response to odor mixtures**

69

70 Single-sensillum recordings were performed on ab1 sensilla of *Orco*<sup>-/-</sup> flies with *Orco*  
 71 restored to *Or10a*-OSN. Odor stimulations were mixtures of acetophenone ( $10^{-2}$  dilution)  
 72 and geraniol ( $10^{-2}$  dilution) as indicated. Note: the odor stimulation would be further  
 73 diluted before reaching the recorded OSNs; these results thus do not directly match the  
 74 corresponding behavioral conditions.

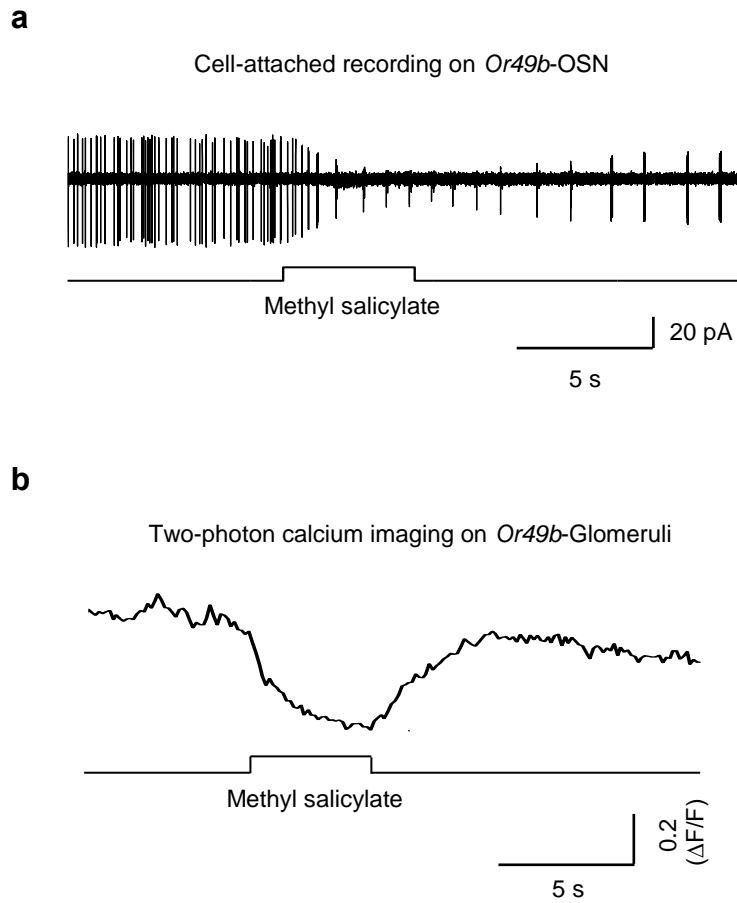

76

77

78 **Supplementary Figure 6**

79

80 **Methyl salicylate-evoked inhibitory responses in *Or49b*-OSNs**

81

82 (a) Cell-attached recordings on *Or49b*-OSN. Odor stimulation: 3 mM methyl salicylate,  
 83 applied for 5 s. (b) Two-photon calcium imaging on the glomeruli labeled by GCaMP6m  
 84 expressing in *Or49b*-OSNs.

85

86  
87  
88  
89  
90

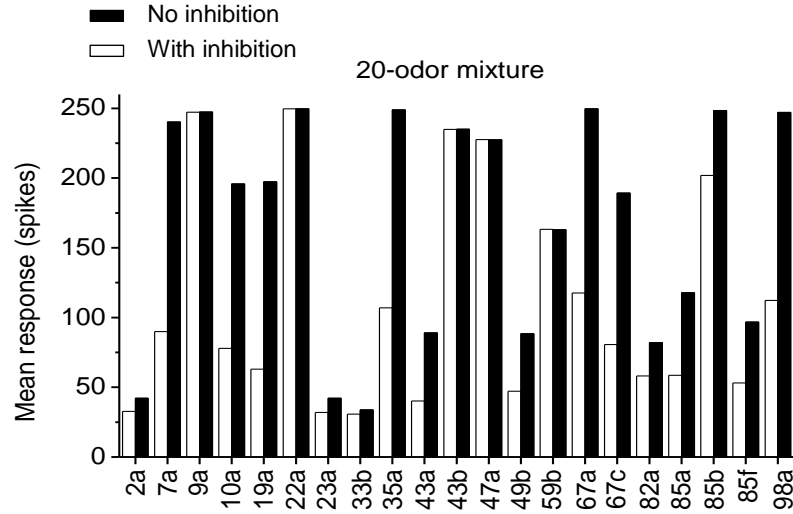

91  
92  
93  
94  
95  
96  
97  
98  
99

### Supplementary Figure 7

#### Reducing response saturation by inhibition

The average activity (spiking rate) of each OR/OSN in response to odor mixtures containing 20 odors. The random-sampling method with a total of 100,000 odor mixtures was used. The inclusion of inhibition reduces the response saturation of many ORs/OSNs.



100  
101

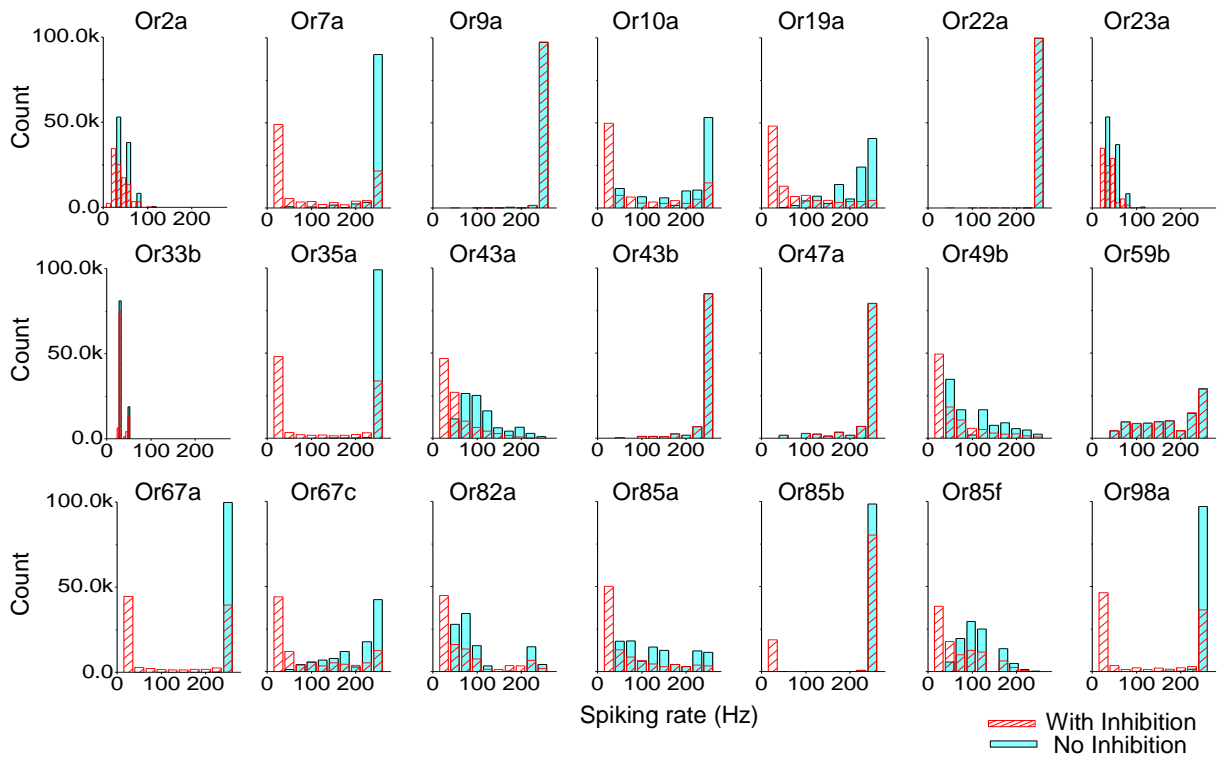

102  
103  
104  
105  
106  
107  
108  
109

### Supplementary Figure 8

#### Decorrelation of odor responses by inhibition

Including the inhibitory response avoids saturation and makes the response more uniform.  
The number of odors in the mixture was 20. The sample size was 100,000 odor mixtures.

110

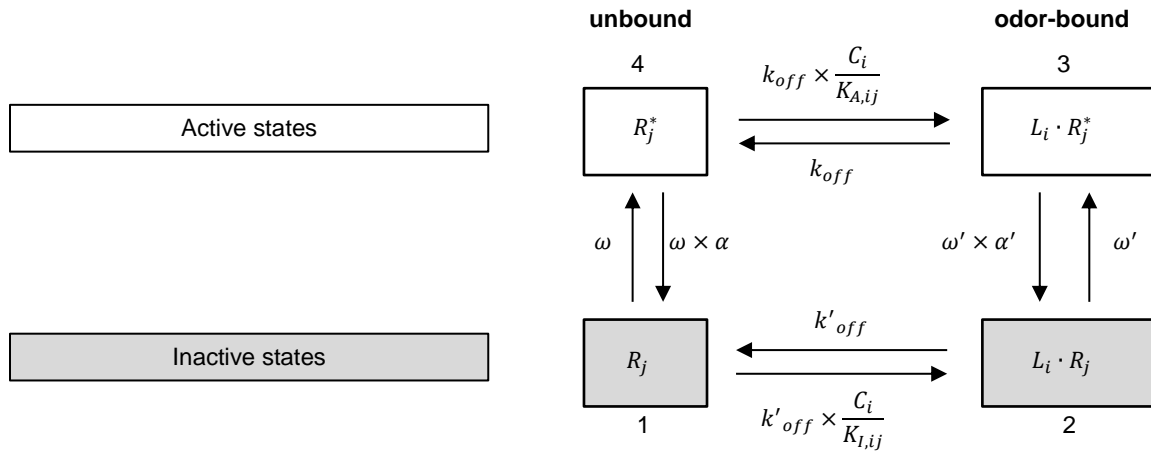

111

112

113

114 **Supplementary Figure 9**

115

116 **Illustration of the different microscopic states of ORs**

117

118 The active and inactive forms of the OR/OSN<sub>j</sub> are represented by  $R_j^*$  and  $R_j$  respectively.

119 The transition rates are given next to the corresponding arrows. The odor is represented

120 by  $L_i$ ,  $k_{off}$ ,  $k'_{off}$ ,  $\omega$ ,  $\omega'$  are kinetic rates,  $\alpha'$  is a ratio of kinetic rates.

121

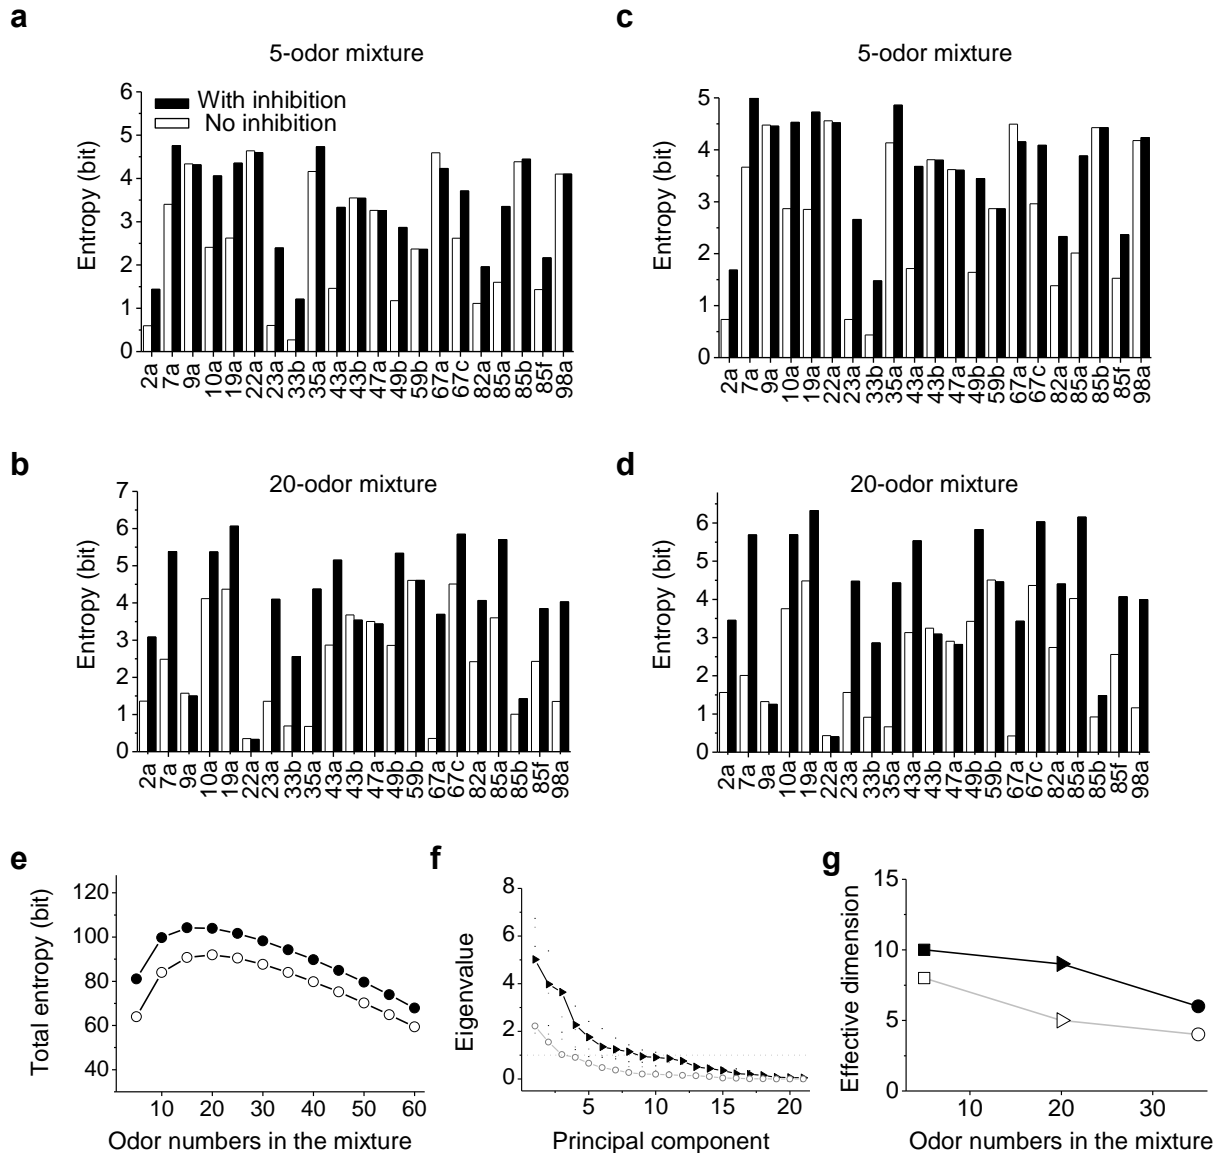

122 **Supplementary Figure 10**

123

124 **Including inhibition increased the information entropy of each OR/OSN**

125

126 (a) The entropy was computed for 100,000 randomly sampled mixtures containing 5  
 127 odors. (b) The entropy was computed for 100,000 randomly sampled mixtures containing  
 128 20 odors. (c) The entropy was computed with the enumeration method for mixtures  
 129 containing 5 odors. (d) The entropy was computed with the enumeration method for  
 130 mixtures containing 20 odors. (e) The entropy was calculated for mixtures containing  
 131 different numbers of odors with competitive binding using the enumeration method.  
 132 Including inhibition increased the total entropy. (f) The eigenvalues of principal  
 133 components increase by including inhibition. The mixture contained 20 odors. (g) The  
 134 effective coding dimension, defined as the number of principal components whose  
 135 eigenvalues are larger than 1 (dashed horizontal line in f).

136 **Supplementary Table 1**

137 **Properties of acetophenone-evoked inhibition of basal activities and E-3-evoked**  
 138 **excitatory responses in *Or85a*-OSNs**

| Odor stimuli                                 | $R_{max}$ (pA)          | $t_{peak}$ (ms)      | $K_{1/2}$ (mM)          |
|----------------------------------------------|-------------------------|----------------------|-------------------------|
| Acetophenone                                 | $18.2 \pm 2.2$ (n = 42) | $275 \pm 25$ (n = 4) | $35 \pm 11$ (n = 4)     |
| E-3                                          | $92.6 \pm 24.4$ (n = 5) | $192 \pm 26$ (n = 5) | $1.1 \pm 0.1$ (n = 5)   |
| E-3 (in the presence of 7.5 mM acetophenone) | $92.8 \pm 24.6$ (n = 5) | $192 \pm 26$ (n = 5) | $26.8 \pm 12.5$ (n = 5) |

139  $t_{peak}$ , or time to peak, is defined as the time duration from odor arrival to the transient  
 140 peak of odor-evoked responses.

141
